# Supplementary material for: Estrogen Receptor β Activation Inhibits Colitis by Promoting NLRP6-Mediated Autophagy
Source: Research Square preprint supplement (doi:10.21203/rs.3.rs-750908/v1), 2021-07-26
Supplement: Supplementary file 2 [file a0a6d2af90a0bb7b828df41b.xlsx]

## Sheet: qPCR-primers
Target	Sequence (5'-3')
human Nlrp6-F	AAGGAACTGGAGCAACTG
human Nlrp6-R	CGATGAACTGGTAGGTGAC
human Esr2-F	TCCATCGCCAGTTATCACATCT
human Esr2-R	CTGGACCAGTAACAGGGCTG
human ASC-F	CGTTGAGTGGCTGCTGGATG
human ASC-R	CAGGCTGGTGTGAAACTGAAGAG
human Caspase-1-F	ACACCGCCCAGAGCACAAG
human Caspase-1-R	TTTCTTCCCACAAATGCCTTCCC
human β-actin-F	GGCATCCACGAAACTACCT
human β-actin-R	ATCTTCATTGTGCTGGGTG

## Sheet: PCR-primers
Target	Sequence (5'-3')
mouse Esr2 Floxed Allele-F	GTATGGATGTCTGGATTGCTTGTT
mouse Esr2 Floxed Allele-R	TACAGTGTGGCTTAGGGGCATAG
mouse Esr2 KO Allele-F1	TAAATCTTAGAGGAGACAGGAGCTGG
mouse Esr2 KO Allele-R1	TGTCTTCAGCCACAACCTACAGTT
mouse Esr2 KO Allele-R2	AAGACGCAGGCAGGCAGCTTTA
mouse Nlrp6 KO Allele-F1	GGTCAGAAACATCCGATCTCTGC
mouse Nlrp6 KO Allele-R1	TGAGTGACAACATTCAGCAACAC
mouse Nlrp6 KO Allele-R2	TGGAAACCACACTCACCTGGAG
human PYD-F	GTGCCCAACAGCATCTCGT
human PYD-R	CTTCTTGTACTCGGACACGGA
human PYD+NBD-F	ATGGACCAGCCAGAGGCC
human PYD+NBD-R	GCCGAAGTGGCGCTCGATG
human LRR-F	ATGACTGACCCACTGTGCCATCTGA
human LRR-R	GTGTGTGATGACCAGATCCGGCTTT
shRNA-Esr2	GGAAATGCGTAGAAGGAATTC
shRNA-Nlrp6 1#	GCTGAGCGAGCAGTCACTACA
shRNA-Nlrp6 2#	GCAGTCACTACAGGAGCTTCA
Chip-qPCR
human Nlrp6-F	TGTGAGGATGACCAGAGG
human Nlrp6-R	TCACAGGATGAGACAGGAGG
EMSA
Nlrp6 probe	TGTGAGGATGACCAGAGGTCACTCTCATTGCCATCTTGGTTCTGGTGGTTTTGGGCCAGCTTCTTTACACCATTATCAGCAAGGCCTTTATGACCTGTATCTTGTGTCAACCTCCTGTCTCATCCTGTGA

## Sheet: Plasmids
Target	Company.	Catalog number
HA-p62	Life Science Market	PVT10361
pCAGGS	Life Science Market	PVT1020
pCMV3-HA-ULK1	Life Science Market	PVT14404
pCAGGS-mCherry-BECN1	This paper	N/A
pCAGGS-mCherry-ATG16L1	This paper	N/A
pCAGGS-mCherry-LC3B	This paper	N/A
pCAGGS-EGFP-NLRP6	This paper	N/A
pCAGGS-mCherry-p62	This paper	N/A
pCAGGS- mCherry-PHB2	This paper	N/A
pCAGGS- mCherry-ULK1	This paper	N/A
pCAGGS-mCherry-NLRP6	This paper	N/A
pCAGGS-FLAG-NLRP6	This paper	N/A
pEGFP-N1-PYCARD-FLAG	Life Science Market	PVT20219
pEGFP-N1-NBD-FLAG	This paper	N/A
pEGFP-N1-PYD+NBD-FLAG	This paper	N/A
pEGFP-N1-LRR-FLAG	This paper	N/A
pGEX-4T-1	Life Science Market	PVT0029
pGEX-4T-1-ERβ	This paper	N/A
pGL3-basic	Promega	E1751
pGL3-Nlrp6 promoter	This paper	N/A
pmCherry-EGFP-LC3B	Life Science Market	PVT10398
pMD2.G	Life Science Market	PVT2321
pLVX-sh Esr2	This paper	N/A
pLVX-sh Nlrp6	This paper	N/A
pLVX-sh RNA2	Clontech	PT4052-5
pRL-TK	Promega	E2241
psPAX2	Life Science Market	PVT2320

## Sheet: Antibodies
Antibodies	Company.	Catalog number
Mouse monoclonal anti-caspase-1 p20	Santa Cruz Biotechnology	SC-398715
Mouse monoclonal anti-Procaspase-1	Santa Cruz Biotechnology	SC-392736
Mouse monoclonal anti-GST	Santa Cruz Biotechnology	SC-80998
Mouse monoclonal anti-IgG	Santa Cruz Biotechnology	SC-52336
Mouse monoclonal anti-Prohibitin 2	Santa Cruz Biotechnology	SC-133094
Mouse monoclonal anti-Procaspase-1, FITC conjugated	Santa Cruz Biotechnology	SC-392736 FITC
Mouse monoclonal anti-ASC, PE conjugated	Santa Cruz Biotechnology	SC-514414 PE
Mouse monoclonal anti-FLAG	Sigma	F3165
Rabbit monoclonal anti-ULK1	Cell Signaling Technology	8054T
Rabbit monoclonal anti-ATG5	Cell Signaling Technology	12994T
Rabbit monoclonal anti-ATG12	Cell Signaling Technology	4180T
Rabbit monoclonal anti-ATG16L1	Cell Signaling Technology	8089T
Rabbit monoclonal anti- BECN1	Cell Signaling Technology	3495T
Rabbit monoclonal anti-SQSTM1/p62	Cell Signaling Technology	8025T
Rabbit monoclonal anti-β-Actin	Cell Signaling Technology	4970S
Rabbit polyclonal anti-K48-linkage Specific Polyubiquitin	Cell Signaling Technology	4289S
Rabbit polyclonal anti-NLRP6	OmnimAbs	OM264589
Rabbit polyclonal anti-ASC	OmnimAbs	OM122624
Rabbit polyclonal anti-ERβ	OmnimAbs	OM252100
Rabbit polyclonal anti-IL-1β	Sangon Biotech	D220820
Rabbit polyclonal anti-TNF-α	Sangon Biotech	D164310
Rabbit polyclonal anti-UBB	Sangon Biotech	D220023
Rabbit polyclonal anti-LC3	Proteintech	14600-1-AP
HRP-Goat Anti-Mouse IgG(H+L)	Abcam	ab205719
HRP-Goat Anti-Rabbit IgG(H+L)	Abcam	ab205718

## Sheet: Reagents
Reagents	Company.	Catalog number
3-Methyladenine	MedChemExpress	HY-19312
Dextran Sulfate Sodium Salt (DSS)-Colitis Grade (36,000-50,000 MW)	MP Biomedicals	02160110-CF
Dimethyl sulfoxide (DMSO), Anhydrous	Thermo Fisher Scientific	D12345
Earle’s Balanced Salts (EBSS)	Gibco	14155063
eBioscience™ Lipopolysaccharide (LPS) Solution (500*)	Thermo Fisher Scientific	497693
ECL western blotting substrate	Vazyme	E41105
Glutathione MagBeads	Genscript	L00327
IPTG, Dioxane-Free	Santa Cruz Biotechnology	SC-202185
Lipofectamine ® 2000 Reagent	Thermo Fisher Scientific	11668019
Propyl pyrazole triol (Synonyms: PPT)	MedChemExpress	HY-100689
Prinaberel (Synonyms: ERB-041)	MedChemExpress	HY-14933
Protease inhibitor cocktail	MedChemExpress	HY-K0010
Proteinase K	TaKaRa	9034
Protein A/G Magnetic Beads	Thermo Fisher Scientific	88848
Puromycin Dihydrochloride	YEASEN	60210ES25
Rapamycin (Synonyms: Sirolimus; AY 22989)	MedChemExpress	HY-10219
DMEM no phenol red (1*)	Thermo Fisher Scientific	21063029
Charcoal-stripped fetal Bovine Serum	Gibco	12676029
5ProLong™ Gold Antifade Mountant with DAPI	Thermo Fisher Scientific	P36931
Cy5	LITTLE-PA®Life Science	A04002
FITC	LITTLE-PA®Life Science	B01007
IL-1β, Human	Genscript	Z02922-10
IL-1β, Mouse	Genscript	Z02985-10
TNF-α, Human	Genscript	Z01001-10
TNF-α, Mouse	Genscript	Z03333-10

## Sheet: Kits
Kits	Company.	Catalog number
BCA protein concentration Quantification kit	YEASEN	20201ES76
CCK-8	YEASEN	40203ES76
Chemiluminescent EMSA Kit	Beyotime	GS009
ClonExpress II One Step Cloning Kit	Vazyme	C112
Dual Luciferase Reporter Gene Assay Kit	Beyotime	RG027
EMSA Probe Biotin Labeling Kit	Beyotime	GS008
Hifair® Ⅱ 1st Strand cDNA Synthesis Kit	YEASEN	11119ES60
Hieff UNICON® qPCR SYBR Green Master Mix	YEASEN	11198ES03
Human IL-1β ELISA kit	Mlbio	Ml028611
Human TNF-α ELISA kit	Mlbio	Ml037301
MitoSOX Red Mitochondrial Superoxide Indicator	Thermo Fisher Scientific	M36008
MitoTracker® Red CMXRos	Thermo Fisher Scientific	M7512
Mouse IL-1α ELISA kit	Mlbio	Ml002273
Mouse IL-1β ELISA kit	Mlbio	Ml063132
Mouse IL-6 ELISA kit	Mlbio	Ml063159
Mouse IL-8 ELISA kit	Mlbio	Ml063162
Mouse TNF-α ELISA kit	Mlbio	Ml002095
Premix Taq™ (LA Taq™ Version 2.0 plus dye)	Takara	RR903
QIAquick DNA purification kit	QIAGEN	28104
Total RNA Kit II	OMEGA	R6934

## Sheet: Cell lines
Cell	Company.	Catalog number
HEK293T cells	ATCC	CRL-11268™
NCM-460 cells	INCELL	N/A
ERβ Knockdown NCM-460 cells (Sh-ERβ)	This paper	N/A
NLRP6 Knockdown NCM-460 cells (Sh-NLRP6)	This paper	N/A

## Sheet: Mouse strains
Mice	Company.	Catalog number
Dppa3-Cre mice	Shanghai Model Organisms Center Inc	NM-KI-00040
Esr2flox/flox mice	Cyagen	TOS160106CC1
Esr2-/- mice	This paper	N/A
Nlrp6+/- mice	Cyagen	KOAI181010JN4
Nlrp6-/- mice	This paper	N/A
