# Supplementary material for: Estrogen Receptor β Activation Inhibits Colitis by Promoting NLRP6-Mediated Autophagy
Source: Research Square preprint supplement (doi:10.21203/rs.3.rs-750908/v1), 2021-07-26
Supplement: Supplementary file 3 [file 99ca89f64882ea96dc4a8f52.xlsx]

## Sheet: Fig1B
IL-1β			IL-1α			IL-6			IL-8			TNF-α
WT-DSS	Esr2-/--DSS		WT-DSS	Esr2-/--DSS		WT-DSS	Esr2-/--DSS		WT-DSS	Esr2-/--DSS		WT-DSS	Esr2-/--DSS
110.828	202.55		75.4635	80.9611		170.665	143.961		220.189	222.276		454.546	665.152
134.338	190.298		77.9068	80.6556		163.213	175.632		223.32	214.969		406.97	718.182
127.384	182.682		75.1581	87.3747		169.289	194.883		210.272	248.315		519.697	616.131
136.987	163.669		66.6065	110.409		225.591	188.795		206.095	201.564		521.212	888.354
132.351	155.68		72.4094	62.9932		155.14	244.498		216.012	168.704		481.818	681.244
Column B	Esr2-/--DSS		Column B	Esr2-/--DSS		Column B	Esr2-/--DSS		Column B	Esr2-/--DSS		Column B	Esr2-/--DSS
vs.	vs.		vs.	vs.		vs.	vs.		vs.	vs.		vs.	vs.
Column A	WT-DSS		Column A	WT-DSS		Column A	WT-DSS		Column A	WT-DSS		Column A	WT-DSS
Unpaired t test			Unpaired t test			Unpaired t test			Unpaired t test			Unpaired t test
P value	0.0008		P value	0.2017		P value	0.5515		P value	0.7729		P value	0.0017
P value summary	***		P value summary	ns		P value summary	ns		P value summary	ns		P value summary	**
Significantly different (P < 0.05)?	Yes		Significantly different (P < 0.05)?	No		Significantly different (P < 0.05)?	No		Significantly different (P < 0.05)?	No		Significantly different (P < 0.05)?	Yes
One- or two-tailed P value?	Two-tailed		One- or two-tailed P value?	Two-tailed		One- or two-tailed P value?	Two-tailed		One- or two-tailed P value?	Two-tailed		One- or two-tailed P value?	Two-tailed
t, df	t=5.179 df=8		t, df	t=1.391 df=8		t, df	t=0.6215 df=8		t, df	t=0.2985 df=8		t, df	t=4.618 df=8

## Sheet: Fig1C
Days	DSS+PBS+ERB-041			DSS+IL-1β+Saline			DSS+IL-1β+ERB-041			DSS+TNF-α+Saline			DSS+TNF-α+ERB-041
0	0	0	0	0	0	0	0	0	0	0	0	0	0	0	0
1	0.3	0.3	-0.1	-0.2	0.1	-0.1	0.3	0.2	-0.3	-0.2	0.1	-0.1	-0.2	-0.4	-0.1
2	0.8	0	0.3	0.3	0.2	0.1	0.3	0.4	-0.5	-0.8	-0.3	-0.4	-0.4	-1.5	0.3
3	0.7	-0.5	0.2	-0.2	-0.2	-0.2	-0.8	-0.5	-1.1	-1.2	-0.8	-0.8	-1.1	-0.8	-0.1
4	-0.4	-0.7	-0.5	-1.8	-0.5	-0.5	-1.5	-1	-1.3	-1.5	-1.5	-1	-1.6	-1.3	-1.5
5	-0.6	-2	-1.1	-2.7	-1.2	-1.4	-2.8	-2.6	-1.9	-2.8	-2.8	-1.5	-2.6	-3.9	-2.7
6	-1.6	-2.8	-2.4	-3.4	-2.1	-2.7	-2.8	-4.2	-3.1	-3.2	-4.1	-2.5	-3.5	-5.2	-3.4
7	-2.7	-3.9	-3.3	-3.8	-3.5	-3.5	-2.9	-4.5	-3.9	-3.5	-4.7	-3.4	-4.1	-5.8	-4.2
8	-3.2	-4.4	-2.6	-4.1	-3.9	-4.1	-2.8	-4.6	-4.5	-3.7	-5	-3.9	-4.8	-6.4	-4.1
9	-3.7	-4.2	-2.8	-4.5	-4.4	-4.6	-2.6	-5.1	-4.3	-4	-5.4	-4.2	-5.1	-6.5	-3.7
10	-2.9	-3.9	-2.2	-5.1	-4.9	-4.9	-2.3	-4.8	-4	-6.5	-5.8	-5.2	-4.6	-6.1	-3.4
11	-2.2	-3.7	-1.6	-5.7	-5.3	-5.4	-2.1	-4.5	-3.6	-7.5	-6.2	-6.5	-4.2	-5.8	-3.2
12	-1.8	-3.1	-1	-5.9	-5.7	-5.7	-1.7	-4.1	-3.3	-8.6	-6.6	-7	-3.7	-5.5	-2.9
Tukey's multiple comparisons test	Mean Diff.	95.00% CI of diff.	Significant?	Summary	Adjusted P Value
DSS+IL-1β+Saline vs. DSS+IL-1β+ERB-041	-2.733	-4.378 to -1.088	Yes	****	<0.0001
DSS+TNF-α+Saline vs. DSS+TNF-α+ERB-041	-3.367	-5.012 to -1.722	Yes	****	<0.0001

## Sheet: Fig1D
DSS+PBS+ERB-041	DSS+IL-1β+Saline	DSS+IL-1β+ERB-041	DSS+TNF-α+Saline	DSS+TNF-α+ERB-041
5.6	4.2	5	4.3	4.9
6.5	3.9	5.4	3.6	5.5
5.9	4	5.7	3.7	4.6
	Column C	DSS+IL-1β+ERB-041	Column E	DSS+TNF-α+ERB-041
	vs.	vs.	vs.	vs.
	Column B	DSS+IL-1β+Saline	Column D	DSS+TNF-α+Saline
	Unpaired t test		Unpaired t test
	P value	0.0038	P value	0.0299
	P value summary	**	P value summary	*
	Significantly different (P < 0.05)?	Yes	Significantly different (P < 0.05)?	Yes
	One- or two-tailed P value?	Two-tailed	One- or two-tailed P value?	Two-tailed
	t, df	t=6.03 df=4	t, df	t=3.302 df=4

## Sheet: Fig1E
Days	WT+Saline					WT+ERB041					Nlrp6-/-+Saline					Nlrp6-/-+ERB-041
0	0	0	0	0	0	0	0	0	0	0	0	0	0	0	0	0	0	0	0	0
1	-0.8	0.3	-0.2	0.6	-0.6	-0.5	1.4	-0.9	0.1	-0.9	-0.1	-0.4	-0.9	0.3	-0.6	-0.1	-1.3	-1	-1.1	-0.9
2	-0.5	0.3	-0.1	0.8	-0.9	-1.2	0.6	-0.7	0.3	-1.3	-0.5	-0.3	-0.1	0.9	-0.1	0.1	-1.2	-0.9	-0.5	-0.7
3	-1.3	0.3	0.3	1.1	0.5	-1	1.6	0.6	-0.2	0.1	-0.2	-0.9	-0.6	0.2	-0.5	0.4	-1.4	-1.2	-0.6	-0.7
4	-1.9	0	0.1	1	0	-1.2	0.6	0.1	-0.2	-0.1	-0.1	-0.6	-0.8	-0.1	-0.2	0.1	-1.4	-1.3	-0.6	-1.1
5	-2.6	-0.5	-0.8	-0.2	-1.5	-3	-1.3	-2	-2	-2.2	-1.8	-3.1	-1.3	-2.2	-1.6	-2.8	-2.5	-1.3	-1.8	-1.9
6	-3.6	-2.5	-2.2	-1.3	-4.3	-3.2	-3.5	-5	-3.4	-4.4	-3.9	-6.2	-4.7	-3.6	-2.8	-3.3	-2.6	-3.5	-2.9	-2.9
7	-5	-3	-4.2	-3.2	-5.6	-3.7	-6.4	-5.2	-5.4	-7	-4.6	-7.6	-5.9	-4.9	-4.5	-5	-4.5	-4.7	-4.7	-4.9
8	-6.2	-4.1	-6	-5.9	-7.9	-5	-7.8	-8	-6.9	-7.9	-6	-9.2	-8.1	-6.9	-7.2	-7.2	-6.7	-6.6	-6.6	-7
9	-7.8	-5.6	-7.8	-7.1	-9.9	-6.7	-9.3	-9.9	-8	-8.1	-8	-11.3	-9.7	-8.5	-7.7	-9.1	-7.8	-8.4	-7.7	-8
10	-9.3	-7.9	-10	-9	-10.8	-8.6	-10.5	-10.5	-8.5	-7	-9	-12.1	-10.7	-9.1	-9.3	-11	-10	-10.1	-8.9	-9.4
11	-11.1	-9	-10.8	-9	-10.8	-6.4	-9.7	-9.5	-8.5	-6.6	-10.4	-12.7	-11.8	-9.7	-9.5	-11.8	-11	-11.5	-9.7	-10.4
12	-8.9	-9.2	-10.8	-9	-10.8	-5	-9.7	-9.5	-8	-6.3	-11.4	-10.4	-12.8	-10.1	-9.9	-12.8	-11.5	-11.1	-9.7	-10.4
Tukey's multiple comparisons test	Mean Diff.	95.00% CI of diff.	Significant?	Summary	Adjusted P Value
WT+Saline vs. WT+ERB041	-2.04	-3.641 to -0.4387	Yes	**	0.0062
Nlrp6-/-+Saline vs. Nlrp6-/-+ERB-041	0.18	-1.421 to 1.781	No	ns	0.9914

## Sheet: Fig1F
WT+Saline	WT+ERB-041	Nlrp6-/-+Saline	Nlrp6-/-+ERB-041
4.8	5.2	3.5	3.6
4	4.8	3.4	3.5
4	4.9	3.5	3.5
4.8	5.5	3.8	3
4.9	5.4	3.9	3.8
Column B	WT+ERB-041	Column D	Nlrp6-/-+ERB-041
vs.	vs.	vs.	vs.
Column A	WT+Saline	Column C	Nlrp6-/-+Saline
Unpaired t test		Unpaired t test
P value	0.0279	P value	0.4173
P value summary	*	P value summary	ns
Significantly different (P < 0.05)?	Yes	Significantly different (P < 0.05)?	No
One- or two-tailed P value?	Two-tailed	One- or two-tailed P value?	Two-tailed
t, df	t=2.681 df=8	t, df	t=0.8552 df=8

## Sheet: Fig1H
IL-1β					TNF-α
WT-saline	WT-ERB-041	Nlrp6-/--saline	Nlrp6-/--ERB-041		WT-saline	WT-ERB-041	Nlrp6-/--saline	Nlrp6-/--ERB-041
138.478	112.036	181.868	172.288		729.643	493.064	992.943	924.045
150.78	105.507	164.832	134.859		782.128	517.659	896.912	810.51
153.727	95.7397	163.548	152.712		744.841	620.884	999.674	846.498
Column B	WT-ERB-041	Column D	Nlrp6-/--ERB-041		Column B	WT-ERB-041	Column D	Nlrp6-/--ERB-041
vs.	vs.	vs.	vs.		vs.	vs.	vs.	vs.
Column A	WT-saline	Column C	Nlrp6-/--saline		Column A	WT-saline	Column C	Nlrp6-/--saline
Unpaired t test		Unpaired t test			Unpaired t test		Unpaired t test
P value	0.0029	P value	0.2443		P value	0.0078	P value	0.0947
P value summary	**	P value summary	ns		P value summary	**	P value summary	ns
Significantly different (P < 0.05)?	Yes	Significantly different (P < 0.05)?	No		Significantly different (P < 0.05)?	Yes	Significantly different (P < 0.05)?	No
One- or two-tailed P value?	Two-tailed	One- or two-tailed P value?	Two-tailed		One- or two-tailed P value?	Two-tailed	One- or two-tailed P value?	Two-tailed
t, df	t=6.501 df=4	t, df	t=1.364 df=4		t, df	t=4.943 df=4	t, df	t=2.181 df=4
IL-1α					IL-6
WT-saline	WT-ERB-041	Nlrp6-/--saline	Nlrp6-/--ERB-041		WT-saline	WT-ERB-041	Nlrp6-/--saline	Nlrp6-/--ERB-041
69.3553	63.5769	127.845	117.53		127.322	87.2217	153.069	146.416
68.7452	80.3353	105.76	86.8887		120.793	121.719	148.409	122.109
84.5051	86.3793	96.6771	91.6204		141.842	129.163	174.131	99.5543
Column B	WT-ERB-041	Column D	Nlrp6-/--ERB-041		Column B	WT-ERB-041	Column D	Nlrp6-/--ERB-041
vs.	vs.	vs.	vs.		vs.	vs.	vs.	vs.
Column A	WT-saline	Column C	Nlrp6-/--saline		Column A	WT-saline	Column C	Nlrp6-/--saline
Unpaired t test		Unpaired t test			Unpaired t test		Unpaired t test
P value	0.7793	P value	0.4385		P value	0.2945	P value	0.0842
P value summary	ns	P value summary	ns		P value summary	ns	P value summary	ns
Significantly different (P < 0.05)?	No	Significantly different (P < 0.05)?	No		Significantly different (P < 0.05)?	No	Significantly different (P < 0.05)?	No
One- or two-tailed P value?	Two-tailed	One- or two-tailed P value?	Two-tailed		One- or two-tailed P value?	Two-tailed	One- or two-tailed P value?	Two-tailed
t, df	t=0.2997 df=4	t, df	t=0.8595 df=4		t, df	t=1.205 df=4	t, df	t=2.287 df=4
IL-8
WT-saline	WT-ERB-041	Nlrp6-/--saline	Nlrp6-/--ERB-041
146.593	166.563	249.058	224.893
181.72	208.769	264.446	232.534
203.785	247.509	301.12	283.88
Column B	WT-ERB-041	Column D	Nlrp6-/--ERB-041
vs.	vs.	vs.	vs.
Column A	WT-saline	Column C	Nlrp6-/--saline
Unpaired t test		Unpaired t test
P value	0.3514	P value	0.3682
P value summary	ns	P value summary	ns
Significantly different (P < 0.05)?	No	Significantly different (P < 0.05)?	No
One- or two-tailed P value?	Two-tailed	One- or two-tailed P value?	Two-tailed
t, df	t=1.054 df=4	t, df	t=1.013 df=4

## Sheet: FigS1A
Days	WT-DSS					Esr2-/--DSS
0	0	0	0	0	0	0	0	0	0	0
1	1.8	1.6	0.8	0.4	1.3	0.4	0.8	0.9	0.1	-0.4
2	0.4	0.4	1.2	1.1	1.2	0.7	0.1	0.4	0.6	0.6
3	0.6	1	0.8	1.1	2	0.5	0.8	0.1	0.8	0.3
4	0.6	1.2	1.2	1	1.5	-0.2	-0.6	0.3	0.6	0.5
5	-0.7	-0.1	0.8	-0.9	1.2	-0.3	-1.4	-0.4	1.1	0.8
6	-2.4	-3.7	-2.9	-2.9	-1.6	-3.6	-3.4	-2.7	-1	-0.6
7	-3.6	-5.2	-4.4	-4	-2.5	-5.3	-6	-6.3	-4.2	-4.3
Sidak's multiple comparisons test	Mean Diff.	95.00% CI of diff.	Significant?	Summary	Adjusted P Value
WT-DSS - Esr2-/--DSS
0	0	-1.251 to 1.251	No	ns	>0.9999
1	0.82	-0.4312 to 2.071	No	ns	0.4367
2	0.38	-0.8712 to 1.631	No	ns	0.982
3	0.6	-0.6512 to 1.851	No	ns	0.7977
4	0.98	-0.2712 to 2.231	No	ns	0.2214
5	0.1	-1.151 to 1.351	No	ns	>0.9999
6	-0.44	-1.691 to 0.8112	No	ns	0.957
7	1.28	0.0288 to 2.531	Yes	*	0.0419

## Sheet: FigS1B
WT-DSS	Esr2-/- -DSS
4.2	3.1
3.9	3.3
5.1	3.5
5	4
4.2	4.2
Column B	Esr2-/- -DSS
vs.	vs.
Column A	WT-DSS
Unpaired t test
P value	0.0267
P value summary	*
Significantly different (P < 0.05)?	Yes
One- or two-tailed P value?	Two-tailed
t, df	t=2.709 df=8

## Sheet: FigS1E
IL-1β
DSS+PBS +ERB-041	DSS+IL-1β+Saline	DSS+IL-1β+ERB-041	DSS+TNF-α +Saline	DSS+TNF-α +ERB-041
82.9475	185.165	144.934	240.965	147.583
61.4901	220.654	127.517	266.265	122.285
95.9603	236.296	103.278	278.35	162.616
	Column C	DSS+IL-1β+ERB-041	Column E	DSS+TNF-α+ERB-041
	vs.	vs.	vs.	vs.
	Column B	DSS+IL-1β+Saline	Column D	DSS+TNF-α+Saline
	Unpaired t test		Unpaired t test
	P value	0.0101	P value	0.0019
	P value summary	*	P value summary	**
	Significantly different (P < 0.05)?	Yes	Significantly different (P < 0.05)?	Yes
	One- or two-tailed P value?	Two-tailed	One- or two-tailed P value?	Two-tailed
	t, df	t=4.587 df=4	t, df	t=7.302 df=4
TNF-α
DSS+PBS +ERB-041	DSS+IL-1β+Saline	DSS+IL-1β+ERB-041	DSS+TNF-α+Saline	DSS+TNF-α+ERB-041
343.152	533.333	296.97	664.529	351.515
368.182	668.015	352.727	632.415	395.454
310.606	515.23	297.576	585.419	438.228
	Column C	DSS+IL-1β+ERB-041	Column E	DSS+TNF-α+ERB-041
	vs.	vs.	vs.	vs.
	Column B	DSS+IL-1β+Saline	Column D	DSS+TNF-α+Saline
	Unpaired t test		Unpaired t test
	P value	0.0077	P value	0.0024
	P value summary	**	P value summary	**
	Significantly different (P < 0.05)?	Yes	Significantly different (P < 0.05)?	Yes
	One- or two-tailed P value?	Two-tailed	One- or two-tailed P value?	Two-tailed
	t, df	t=4.968 df=4	t, df	t=6.84 df=4

## Sheet: FigS1G
Days	WT-DSS					Nlrp6-/--DSS
0	0	0	0	0	0	0	0	0	0	0
1	0	0.2	0.3	0.6	0.6	1	0.3	0.2	0.3	0.1
2	0.2	0.1	0.3	0.2	0.8	-0.2	0.2	0.1	0.4	0.3
3	-0.3	0.5	0.3	-0.4	1.1	0	0.3	-0.1	0.8	-0.2
4	-0.9	-0.8	0	-0.2	1	-0.5	-0.3	-0.1	0	-0.2
5	-0.6	-1.2	-0.5	-0.5	-0.2	-2.4	-2.3	-1.1	-1.4	-2
6	-1.1	-1.7	-2.5	-0.9	-1.3	-3	-2.2	-2.4	-2.5	-3.4
7	-2.2	-2.7	-3	-2	-3.2	-3.5	-3	-4	-3.8	-5.4
Sidak's multiple comparisons test	Mean Diff.	95.00% CI of diff.	Significant?	Summary	Adjusted P Value
WT-DSS - Nlrp6-/--DSS
0	0	-0.8521 to 0.8521	No	ns	>0.9999
1	-0.04	-0.8921 to 0.8121	No	ns	>0.9999
2	0.16	-0.6921 to 1.012	No	ns	0.9993
3	0.08	-0.7721 to 0.9321	No	ns	>0.9999
4	0.04	-0.8121 to 0.8921	No	ns	>0.9999
5	1.24	0.3879 to 2.092	Yes	***	0.0009
6	1.2	0.3479 to 2.052	Yes	**	0.0015
7	1.32	0.4679 to 2.172	Yes	***	0.0004

[truncated: 27 more sheets: FigS1H, FigS1J, Fig2A, Fig2B, Fig2D, Fig2E, Fig2F, Fig2I, FigS2A, FigS2B, FigS2C, FigS2D, Fig3A, Fig3E, FigS3B, FigS3C, FigS3D, FigS4A, FigS4C, Fig6A …]
